# Supplementary material
Source: publisher site journal article supplement (https://www.dovepress.com/article/440437)
Supplement: Supplementary file 1 [file get_supplementary_file.php]

**Figure S1 KNOWLEDGE IN BASIC AND ADVANCED LIFE SUPPORT IN ECUADORIAN DOCTORS**

**Section 1:**

Gender: Male ( ) Female ( ) I'd rather not say it ( )

Age (please provide in years): ___ years.

What is your job profile?

General practitioner ( ) Medical specialist ( )

Where do you perform your duties?

Health Center ( ) Basic Hospital ( ) General Hospital ( ) Specialty Hospital ( )

To which sector does your workplace belong?

Public Sector ( ) Private Sector ( )

In which area do you work?

Outpatient ( ) Emergency ( ) Intensive Care ( ) Anesthesiology ( ) Surgery ( ) Cardiology ( ) Internal Medicine ( ) Orthopedics ( ) Other ( ) Specify: ____

How long does it take to develop your work activities as professionals?

Less than 3 years

3 – 6 years

6 – 10 years

More than 10 years

**Section 2:**

Did you receive Basic Life Support (BLS) or Advanced Life Support (ALS) training during your college education?

Yes

No

Have you ever been certified in Basic Life Support (BLS)? (Through a specialized course)?

Yes

No

If your answer was Yes:

How many times have you applied your knowledge (provided care in emergency situations) at BLS over the past year?

Less than 3 times

3 – 6 times

More than 6 times

Have you ever become certified in Advanced Life Support (ALS)? (Through a specialized course)?

Yes

No

If your answer was Yes:

How many times have you put your knowledge into practice (provided care in emergency situations) at ALS over the past year?

Less than 3 times

3 – 6 times

More than 6 times

Do you think your knowledge of BLS is sufficient to provide effective care in emergencies?

Yes

No

Do you think your knowledge of ALS is sufficient to provide effective care in emergencies?

Yes

No

Outside of official certification courses. Have you sought to update, acquire or improve your life support skills through any of the following resources?

I have not used any information resources

Yes, through scientific articles

Yes, through the official Basic and Advanced Life Support guides

Yes, through videos

Yes, through evidence-based summaries (UoToDate, Dynamed)

Yes, through other sources

**Section 3 - BLS Knowledge:**

What is the correct sequence of actions during the application of BLS on an adult victim with a rescuer?

1. Evaluate the person, call the emergency department, take care of yourself, CPR, defibrillate
2. Protect yourself, evaluate the person, call the emergency department, defibrillate, perform CPR
3. Protect yourself, evaluate the person, perform CPR, call the emergency department, defibrillate
4. Protect yourself, evaluate the person, call the emergency department, perform CPR, defibrillate.

How can you check the victim's responsiveness?

1. Shake the person, tap his or her shoulder hard, and talk out loudly.
2. Shake the person and feel arterial pulses.
3. Shake the person, listen to their breathing, talk out loudly.
4. Shake the person, touch your leg hard, talk out loudly.

What is the main action to keep the airways open?

1. Head tilt/chin descent maneuver
2. Head tilt/chin lift maneuver
3. Head rectification/chin descent manoeuvre
4. Head rectification/chin lift manoeuvre

What is the compression-to-ventilation ratio in an adult victim with one rescuer?

1. 30/2
2. 30/1
3. 40/2
4. 30/4

What is the correct hand placement for chest compressions in adult resuscitation?

1. Use the heel of one hand on the upper half of the breastbone in the center of the chest and place the other hand on top of the first.
2. Use the heel of one hand on the lower half of the breastbone in the center of the chest and place the other hand on top of the first.
3. Use the heel of one hand on the lower half of the breastbone in the center of the chest and place the other hand beside the first.
4. Use the heel of one hand on the upper half of the breastbone on the side of the chest and place the other hand on top of the first.

How deep should the chest be compressed during chest compressions in adult resuscitation?

1. 1-2 cm
2. 3-4 cm
3. 5-6 cm
4. 7-8 cm

Which of the following is NOT a complication of performing BLS?

1. Rib or sternal fractures
2. Liver lesions
3. Pneumothorax
4. Pneumomediastinum

What is the maximum time allowed to evaluate pulse and breathing in an unconscious person?

1. 20 seconds
2. 30 seconds
3. 10 seconds
4. 15 seconds

At what chest compression fraction does the probability of return of spontaneous circulation increase?

1. 40%
2. 50%
3. 60%
4. 70%

In a person who has regained a pulse after CPR but continues to be unresponsive or is not breathing, how many rescue ventilations should be provided per minute?

1. 18 – 20 rpm
2. 5 – 6 rpm
3. 10 – 12 rpm
4. Do not ventilate

**Section 4 - ALS Knowledge:**

What is the recommended dose of epinephrine for cardiac arrest?

1. 1.0 mg (1:10000) IV/IO
2. 0.1 mg (1:100000) IV/IO
3. 10.0 mg (1:1000) IV/IO
4. 1 ampoule (1:1000) in 10 ml of saline.

Which of the following is a shockable rhythm?

1. Ventricular fibrillation
2. Ventricular tachycardia (no pulse)
3. Torsades de Pointes
4. All of the above

Which of the following antiarrhythmic medications is NOT recommended for persistent ventricular fibrillation or pulseless ventricular tachycardia?

1. Amiodarone
2. Lidocaine
3. Atropine
4. Epinephrine

What is the maximum dose of atropine for symptomatic bradycardia?

1. 2 mg
2. 3 mg
3. 4 mg
4. 5 mg

What is the maximum dose of amiodarone?

1. 300 mg
2. 400 mg
3. 450 mg
4. 500 mg

Which of the following are causes of pulseless electrical activity?

1. Hypovolemia
2. Hypoglycemia
3. Hypothermia
4. Acidosis
5. Hypoxia

Which information is crucial to obtain for all individuals presenting with a stroke?

1. Date of birth
2. Glycosylated hemoglobin
3. Bilateral arm blood pressure
4. Last known well time

In post-cardiac arrest care, which of the following respiratory parameters is NOT considered stable?

1. Maintain 16 rpm
2. Oximetry 92-98%
3. PaCO2 35-45 mmHg
4. Waveform capnography

Induced hypothermia is known to aid in brain recovery after cardiac arrest. What is the target core body temperature range during induced hypothermia?

1. 30 – 34 °C
2. 32 – 36 °C
3. 33 – 36 °C
4. 32 – 35 °C

What is the initial shock energy dose during defibrillation?

1. 160-240 J
2. 100-150 J
3. 120-200 J
4. 200-300 J
